# Supplementary material for: An ultrasensitive electrochemical impedance sensor for a special BRCA1 breast cancer gene sequence based on lambda exonuclease assisted target recycling amplification
Source: Royal Society of Chemistry journal article supplement (doi:10.1039/c2cc31588b), 2012-01-01
Supplement: c2cc31588b.pdf [file c2cc31588b.pdf]

## Supporting Information

### 1. Experimental Section

#### 1.1. Materials and chemicals

All oligonucleotides are synthesized by Sangon Inc. (Shanghai, China). Their sequences are shown below:

Capture DNA 1: 5'-PHOS- G ATT TTC TTC CTT TTG TTC-HS-3'

Capture DNA 2: 5'- G ATT TTC TTC CTT TTG TTC-HS-3

Target DNA (BRCA1 breast cancer gene): 5'- GAA CAA AAG GAA GAA AAT C  
-3'

Single-base mismatched DNA: 3'- GAA CAA AAG CAA GAA AAT C -5'

Random DNA: 3'- GGT CAG GTG GGG GGT ACG CCA GG -5'

3' end of capture DNA was thiolated which could be immobilized on the gold electrode. Target DNA could hybridize with capture DNA. Single-base mismatched DNA contained a mismatched single base (in underline).

Tris-(2-carboxyethyl) phosphine hydrochloride (TCEP) and 6-mercaptohexanol (MCH) were purchased from Sigma (St. Louis, MO) and used without further purification. Other chemicals employed were analytical reagent grade and double distilled water (Milli-Q, Millipore, resistance 18.2-MΩ) was used throughout the experiments.

DNA buffer solutions (the concentrations of oligonucleotides are 1 μM) were obtained by dissolving oligonucleotides in 40 mM Tris-acetate buffer solution (pH 7.4) containing 200 mM NaCl and 1 mM MgCl<sub>2</sub>.

23 Lambda exonuclease (concentration, 10 units/ $\mu$ L) and its 10 $\times$  reaction buffer  
24 (containing 670 mM glycine-KOH (pH 9.4), 25 mM MgCl<sub>2</sub>, 0.1% (v/v) Triton X-100)  
25 were purchased from Sangon Inc. Storage buffer of lambda exonuclease contains 25  
26 mM Tris-HCl (pH 8.0), 0.1 mM EDTA, 1 mM DTT, 50 mM NaCl, 0.1% (v/v) Triton  
27 X-100 and 50% (v/v) glycerol. The 10 $\times$  reaction buffer consists of 670 mM  
28 glycine-KOH (pH 9.4), 25 mM MgCl<sub>2</sub>, and 0.1% (v/v) Triton X-100.

29 5 mmol/L [Fe(CN)<sub>6</sub>]<sup>3-/4-</sup> solution containing 0.1 mol/L KCl was prepared and used  
30 for electrochemical measurement.

### 31 **1.2. Apparatus**

32 All electrochemical measurements were carried out using CHI 660D  
33 electrochemical system (CH Instruments, Shanghai, China) at room temperature. A  
34 three-electrode electrochemical cell was used. Gold electrode (2 mm in diameter, CH  
35 Instruments, Shanghai, China) was used as the working electrode. Platinum wire and  
36 Ag/AgCl (saturated with KCl) were used as counter and reference electrodes,  
37 respectively.

### 38 **1.3. Preparation of the sensor**

39 A gold electrode was polished with aqueous slurries of 1.0  $\mu$ m, 0.3  $\mu$ m and 0.05  
40  $\mu$ m  $\alpha$ -Al<sub>2</sub>O<sub>3</sub> powders on a polishing microcloth and sonicated with deioned water,  
41 ethanol for 3 min, respectively. Finally, the gold electrode was rinsed with deioned  
42 water, and then electrochemically cleaned by consecutively cycling in the potential  
43 range of 0 ~ 1.6 V in 0.5 M sulfuric acid. Prior to attachment to the gold surface,  
44 thiolated capture DNA was incubated with 100 mM TCEP for 1 h to reduce disulfide

45 bonds and subsequently diluted to 0.1  $\mu\text{M}$  with phosphate buffer. The clean gold  
46 electrode was then immersed into the reduced capture DNA solution for 60 min in the  
47 dark. The functionalized surface was subsequently passivated with 1 mM MCH for 2  
48 h at room temperature. Thus, this capture DNA/MCH modified electrode was used for  
49 the following experiment. (Note: After each treatment, the electrode should be rinsed  
50 with deionized water or buffer solution to eliminate the physical adsorption)

#### 51 **1.4. DNA Target hybridization and exonuclease digestion.**

52 The capture DNA/MCH modified electrode was then incubated in the reaction  
53 solution to allow the capture DNA to react with the DNA (target, single-base  
54 mismatched or uncomplimentary DNA, respectively) and exonuclease (0.2 units/ $\mu\text{L}$ )  
55 in solution. All reactions were performed for 80 min (except for the time-course  
56 study) in 37  $^{\circ}\text{C}$  water bath in the dark. After the reactions, the electrode was switched  
57 to phosphate buffer to equilibrate for at least 30 min prior to measurements.

#### 58 **1.5. Electrochemical detection**

59 The above treated gold electrode, as the working electrode, was immersed into the  
60 electrochemical cell containing 5 mM  $[\text{Fe}(\text{CN})_6]^{3-/4-}$  solution containing 0.1 M KCl,  
61 and then EIS was performed. The parameter of EIS was set as follow: The based  
62 potential was 0.214 V (vs. Ag/AgCl) and the amplitude was 5.0 mV, and the  
63 electrochemical impedance spectra were recorded in the frequency range of 10 kHz to  
64 1 Hz. The data are represented in Nyquist plots ( $Z''$  vs.  $Z'$ ,  $Z''$ = imaginary part of  
65 impedance and  $Z'$ = real part of impedance). The impedance spectra are fitted to a  
66 Randles equivalent electrical circuit for this modified electrode, containing the

67 electrolyte solution resistance  $R_s$ , the surface electron transfer resistance  $R_{ct}$  ( $R_{ct}$   
68 reflects the surface condition of the gold electrode surface), the Warburg impedance  
69  $Z_w$  and the constant phase element related to double layer capacitance  $C_{dl}$ . From the  
70 regression, the charge-transfer resistance  $R_{ct}$  is obtained and used to quantified assay.

## 71 **2. Optimization of Experimental Conditions**

72 In order to obtain well assay result, some factors are investigated in detail. The  
73 surface density of capture DNA on the electrode is a crucial parameter contributing to  
74 signal gain, which can be controlled by varying the probe concentration during sensor  
75 fabrication. To optimize the signal gain, the performance of the sensors fabricated  
76 with different concentrations of capture DNA is studied under standard reaction  
77 conditions with 1 nM target DNA and 0.2 units/ $\mu$ L exonuclease. The change of  $R_{ct}$   
78 ( $\Delta R_{ct} = R_{ct0} - R_{ct1}$ , where  $R_{ct0}$  and  $R_{ct1}$  represent charge-transfer resistances of capture  
79 DNA modified electrode and capture DNA-target DNA/MCH modified electrode  
80 after being immersed into the lambda exonuclease in reaction buffer solution,  
81 respectively) is used to characterize the change of electrode surface. As shown in  
82 **Figure S1A**, with increasing capture DNA concentration,  $\Delta R_{ct}$  enhances  
83 monotonically. When the concentration of capture DNA is 1.0  $\mu$ M (a packing density  
84 of  $1.34 \times 10^{12}$  molecule/ $\text{cm}^2$ ), a maximal  $\Delta R_{ct}$  is observed. However, when the  
85 concentration of capture DNA exceeds 1.0  $\mu$ M, the value of  $\Delta R_{ct}$  gradually decreases.  
86 The reason may lie in that at the low molecular coverage capture DNA easily  
87 hybridize with target DNA to form dsDNA, thus the digestion can perform, resulting  
88 in large  $\Delta R_{ct}$ . While at high surface density it is difficult to form dsDNA due to the

89 spatial restriction effects, which affects the digestion, resulting in the decrease of  $\Delta R_{ct}$ .  
90 Hence, 1.0  $\mu\text{M}$  capture DNA is chosen as the optimal concentration for the following  
91 experiment.

92 Next, the digestion time of lambda exonuclease is checked. This time-course study  
93 is performed in the presence of 1.0  $\mu\text{M}$  capture DNA, 0.2 units/ $\mu\text{L}$  lambda  
94 exonuclease, 1.0nM and 10nM target DNA, respectively. The result is shown in  
95 Figure S1B. It is found that within 80 min  $\Delta R_{ct}$  enhances quickly, while digestion  
96 time is over 80 min, the increase of the  $\Delta R_{ct}$  becomes slow (1.0nM target DNA, curve  
97 1). To higher concentration target DNA (10nM, curve 2), when the digestion time  
98 reaches about 68 min, the increase of the  $\Delta R_{ct}$  becomes slow. Hence, 80 min is used  
99 as the optimal digestion time in this experiment.

### 100 3. Efficiency of Signal Amplification

101 Under the above optimized condition, the absolute values of  $R_{ct}$  ( $|\Delta R_{ct}|$ ) of the  
102 sensor between the absence and presence of lambda exonuclease are compared. The  
103 concentrations of capture DNA, target DNA and lambda exonuclease are 1.0  $\mu\text{M}$ , 1.0  
104 nM and 0.2units/ $\mu\text{L}$ , respectively. The results are shown in [Figure S3](#). Firstly, in the  
105 absence of lambda exonuclease, after the hybridization a low  $|\Delta R_{ct}|$  (130  $\Omega$ , histogram  
106 a) is obtained. In the presence of lambda exonuclease,  $|\Delta R_{ct}|$  has 9-folds improvement  
107 (1130  $\Omega$ , histogram b) over the sensor without the amplification of exonuclease.  
108 Without exonuclease, one target DNA can just hybridize with one capture DNA,  
109 resulting in the slight  $|\Delta R_{ct}|$ . The presence of exonuclease digests capture DNA and  
110 releases target DNA, and then the released target DNA can hybridize with other

111 capture DNA to trigger a new cycle. The final result is that the negative charge  
112 decreases sharply, resulting in the distinct  $|\Delta R_{ct}|$ . Therefore, it is proved that the  
113 introduction of exonuclease can amplify the signal. Thus, combination of EIS and  
114 exonuclease, the amplified detection of target DNA can be achieved.

#### 115 **4. Specificity**

116 The selectivity of the present biosensor was investigated by using the capture DNA  
117 to hybridize with the same concentration (1 nM) of complete complementary target  
118 DNA sequence, single-base mismatched DNA sequence and noncomplementary DNA  
119 sequence, respectively. As shown in [Figure S4](#), after the digestion a large  $\Delta R_{ct}$  is  
120 observed for the target DNA (histograms a). Whereas, there is a small  $\Delta R_{ct}$  when the  
121 capture DNA hybridized with noncomplementary DNA, which due to the no  
122 successful hybridization between the capture DNA and noncomplementary DNA  
123 (histogram c). Additionally, a small  $\Delta R_{ct}$  (histogram b) is observed for single-base  
124 mismatched DNA, which indicates that much negative charge is still on the electrode  
125 surface due to the unaccomplished hybridization (attributed to the base  
126 mismatch). This result shows that this sensor has hybridization specificity. However,  
127 using this DNA sensor it is difficult to differentiate single base from low  
128 concentration matched DNA, one of the reasons is that the signal of the single base  
129 mismatch DNA may be blocked by that of matched DNA. Hence, improved strategies  
130 need to be developed to overcome this shortage in the future.

131 After the digestion, the modified electrodes are preformed EIS measurement at  
132 least 5 times. It is found that the relative standard deviations (RSD) of  $R_{ct}$  are in the

133 range of 1.2% to 1.8%. Moreover, after the test, the electrodes are polished and  
134 remodified. Under the same condition, 6.2% of  $R_{ct}$  change can be achieved compared  
135 with the previous measurement. These results show this target recycling DNA sensor  
136 has good stability and regeneration.

137

138

139

140

141

142

143

144

145

146

147

148

149

150

151

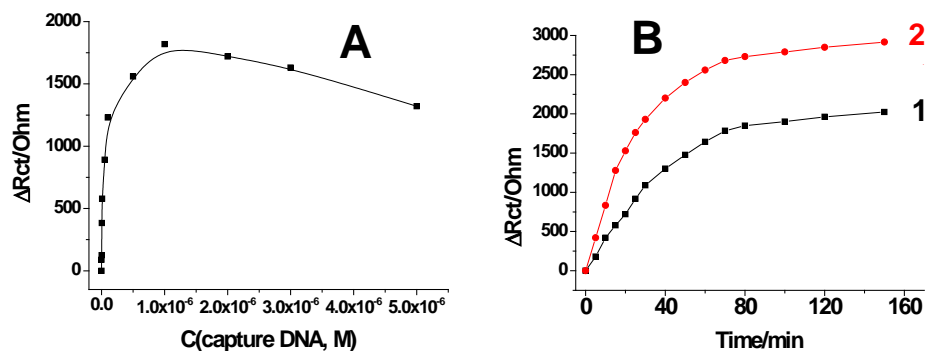

152

153 **Figure S1** (A) The effect of capture DNA concentration. (B) The influence of the  
154 digestion time between dsDNA/MCH modified gold electrode and lambda  
155 exonuclease. Curve 1: 1.0 μM capture DNA, 0.2 units/μL lambda exonuclease and  
156 1.0nM target DNA; Curve 2: 1.0 μM capture DNA, 0.2 units/μL lambda exonuclease  
157 and 10nM target DNA.

158

159

160

161

162

163



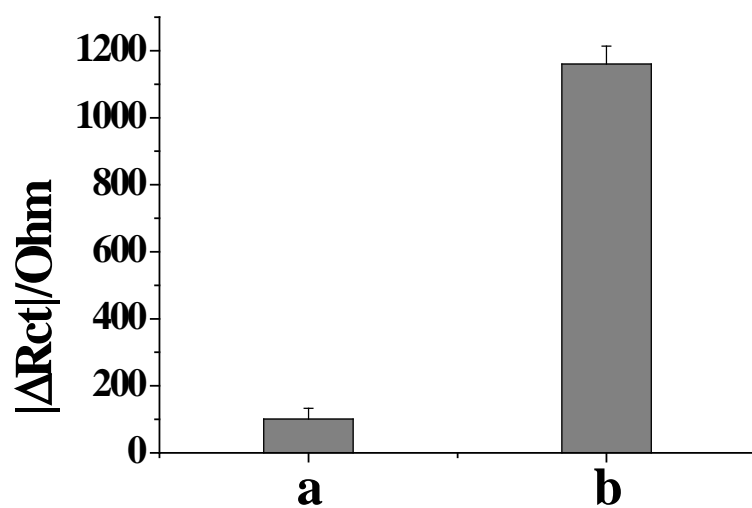

164

165 Figure S2 Changes of  $R_{ct}$  ( $|\Delta R_{ct}|$ ) in the presence of capture DNA with PHOS

166 (histogram a) and without PHOS (histogram b) in its terminal.

167

168

169

170

171

172

173

174

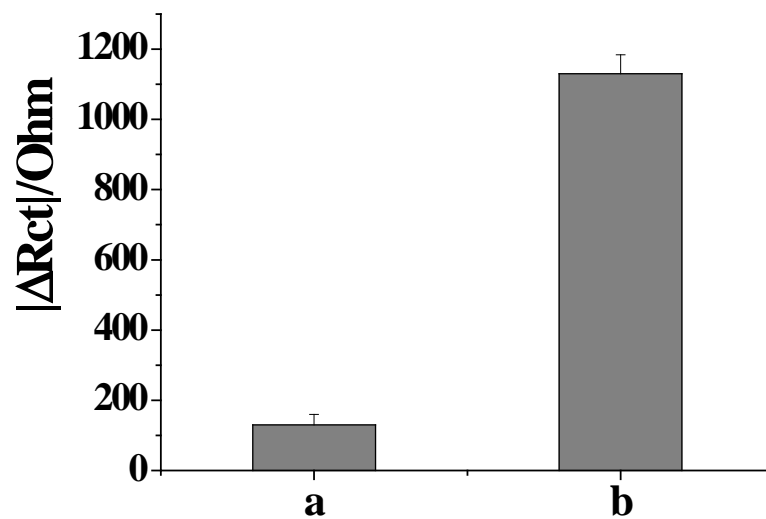

175

176 **Figure S3** Changes of  $R_{ct}$  ( $|\Delta R_{ct}|$ ) between the absence (histogram a) and presence

177 (histogram b) of lambda exonuclease.

178

179

180

181

182

183

184

185

186

187

188

189

190

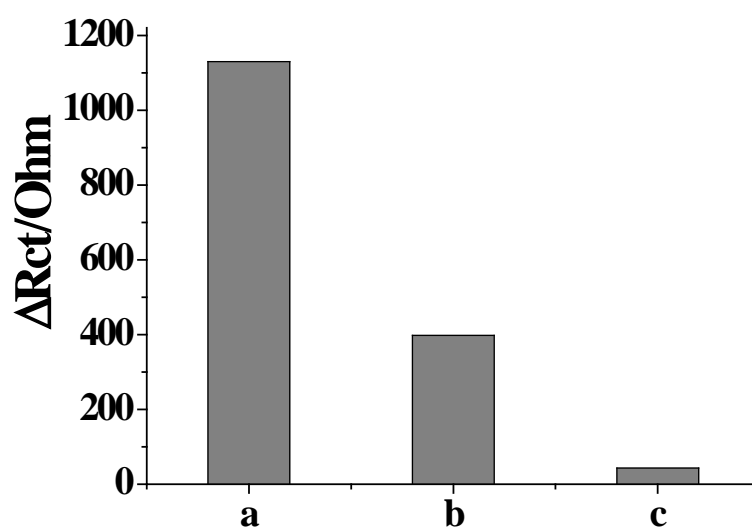

191

192 **Figure S4** Histogram of  $R_{ct}$  change after hybridization with different kinds of target

193 DNA: (a) complementary DNA; (b) single-base mismatched DNA sequence and (c)

194 noncomplementary DNA sequence. Concentrations of three kinds of DNA are 1 nM.

195

196
